# Supplementary material
Source: MDPI journal article supplement (https://www.mdpi.com/2073-4395/14/5/999)

HPLC chromatograms of betalains in experimental beet accessions.

Decoding of peaks: prebetanin (1), betanin (2), isoprebetanin (3), betanidin (4), isobetanin (5), 17-decarboxy-neobetanin (6), 17-decarboxy-betanidin (7), 15-decarboxy-betanidin (8), 17-decarboxy-betanin (9), 17-decarboxy-isobetanidin (10), 2,17-bidecarboxy-betanin (11), 2,17-Bidecarboxy-neobetanin (12), 6'-O-Feruloyl-betanin (13), 6'-O-Feruloyl-isobetanin (14), 2-Decarboxy-isobetanin (15), 2-Decarboxy-betanin (16), Vulgaxanthin I (17), Valine-betaxanthin (18), Vulgaxanthin IV (19), Tryptophan-betaxanthin (20), Tyramine-betaxanthin (21), 3-Methoxytyramine-betaxanthin (22), Phenylalanine-betaxanthin (23), Threonine-betaxanthin (24), Miraxanthin II (25), GABA-betaxanthin (26).

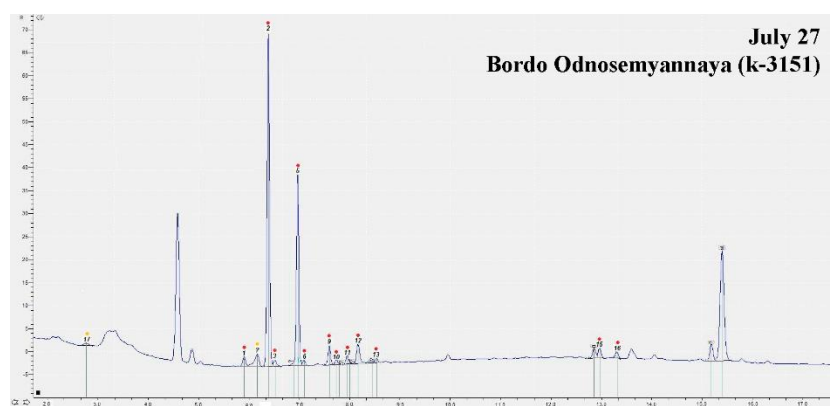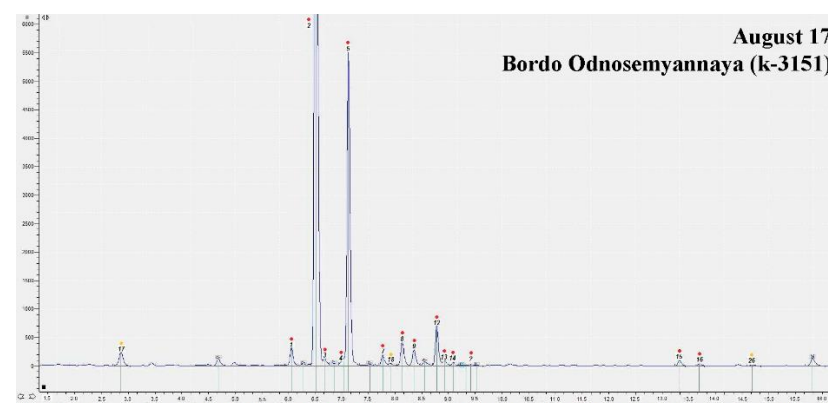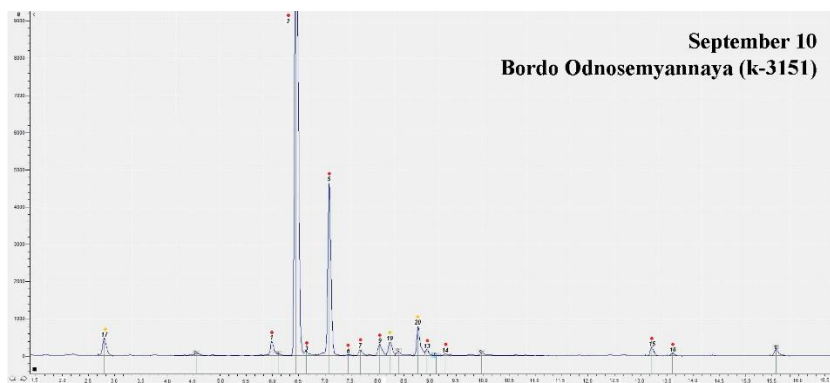

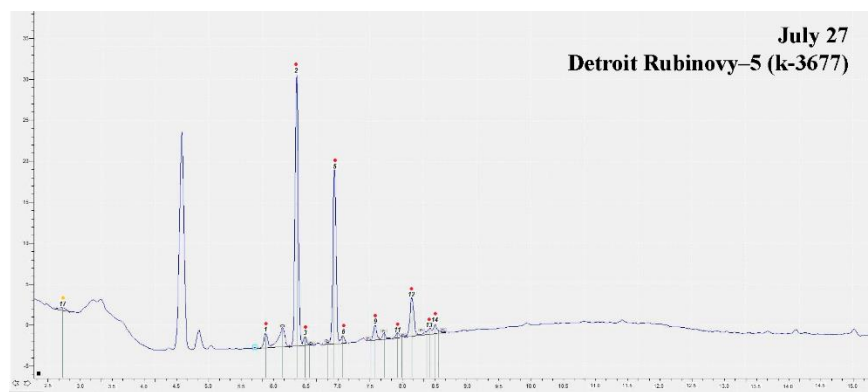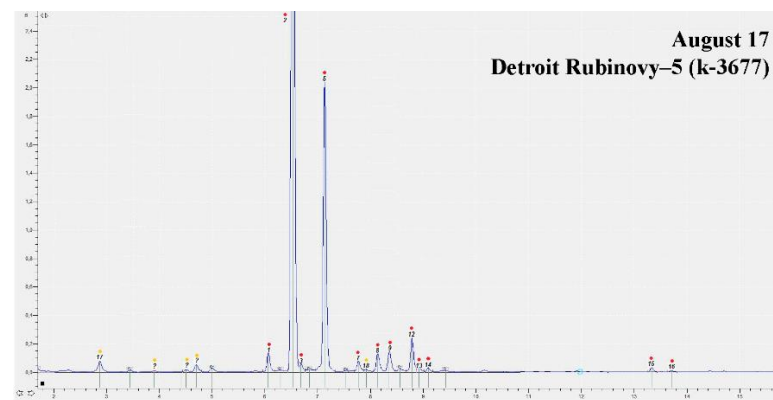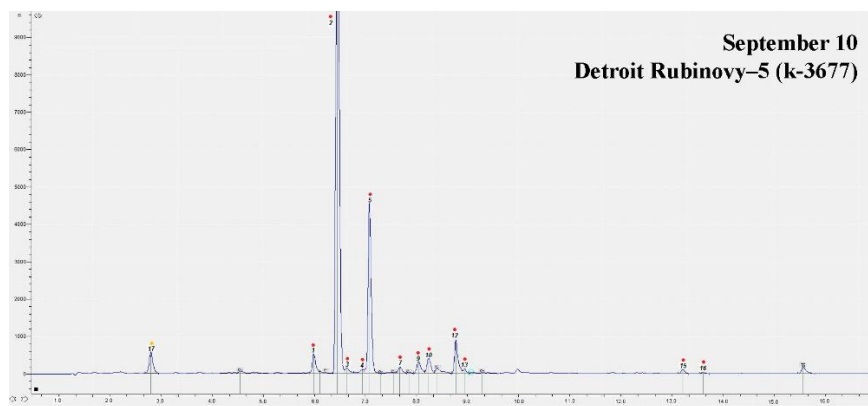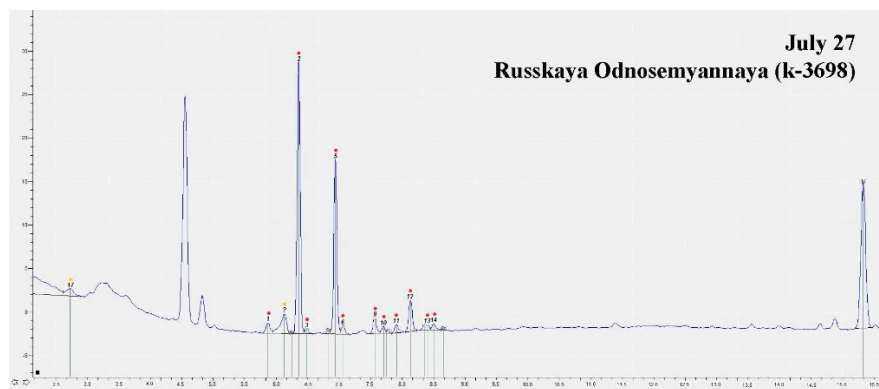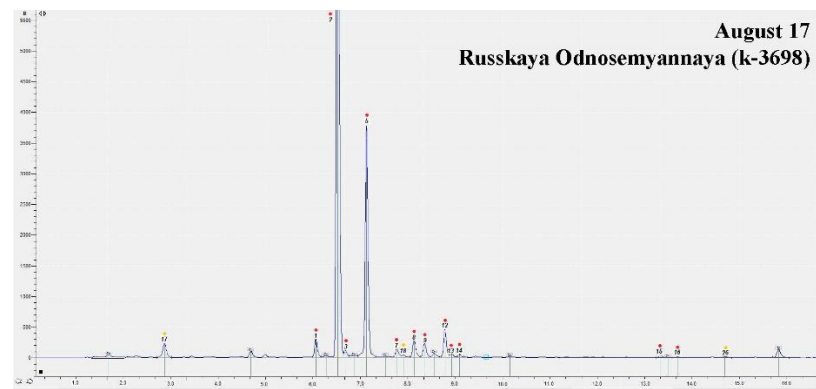

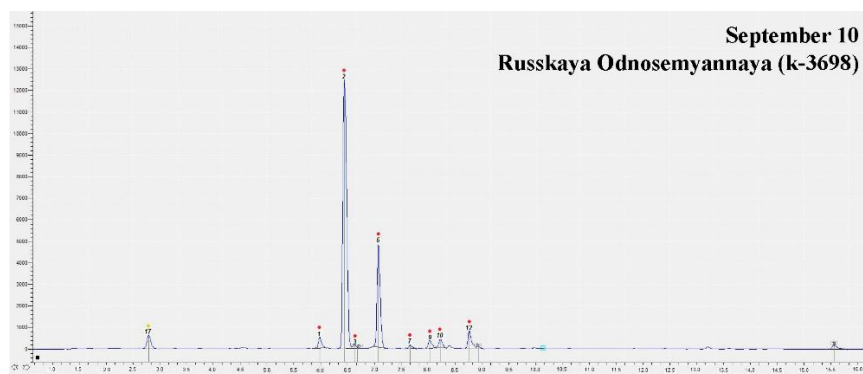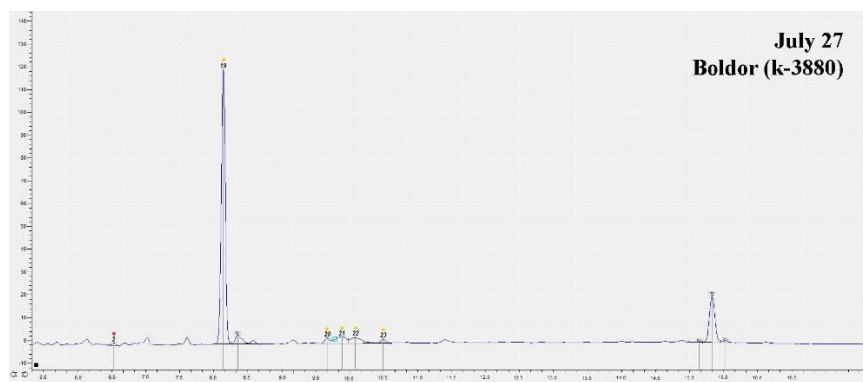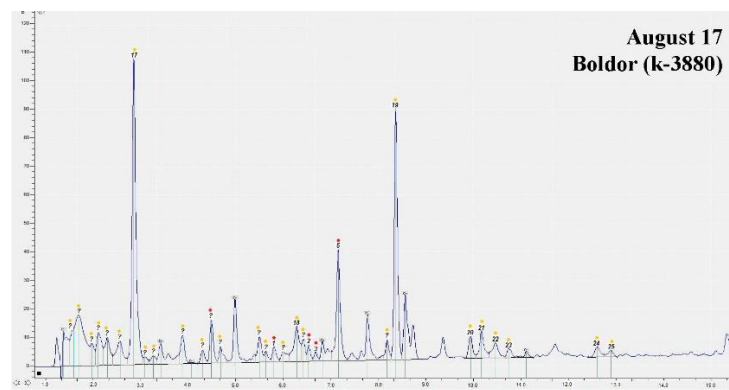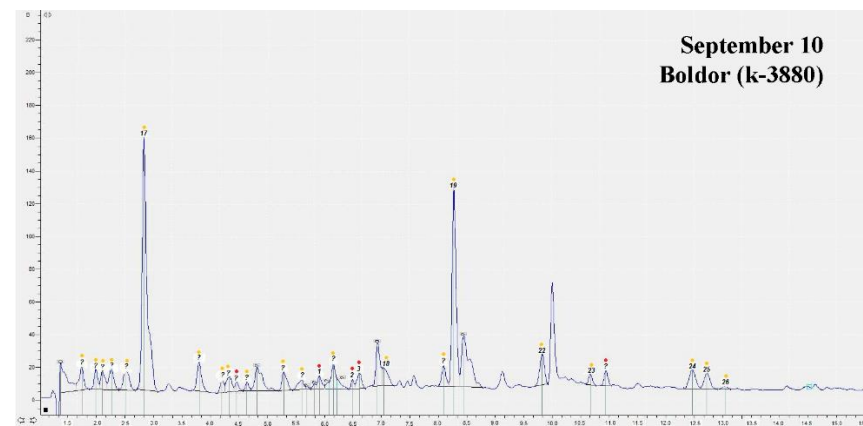

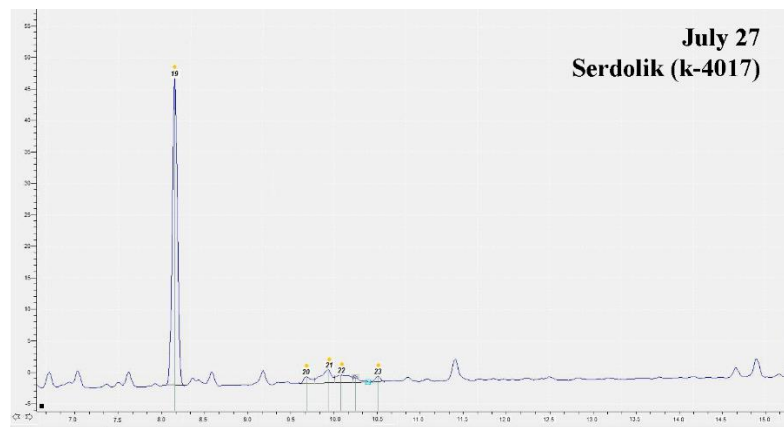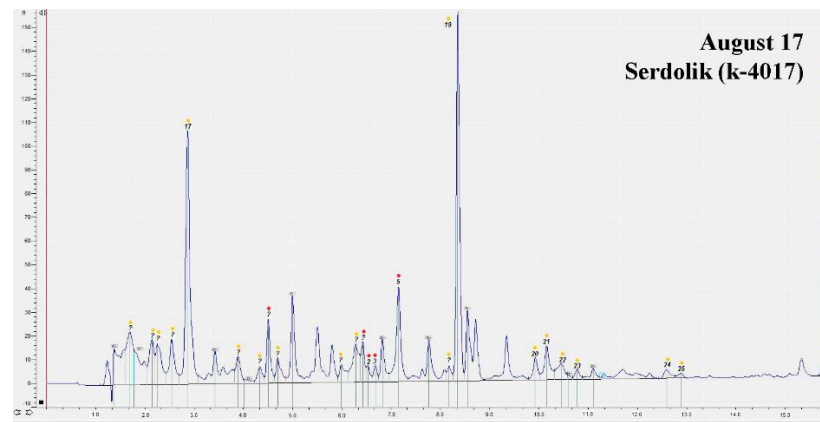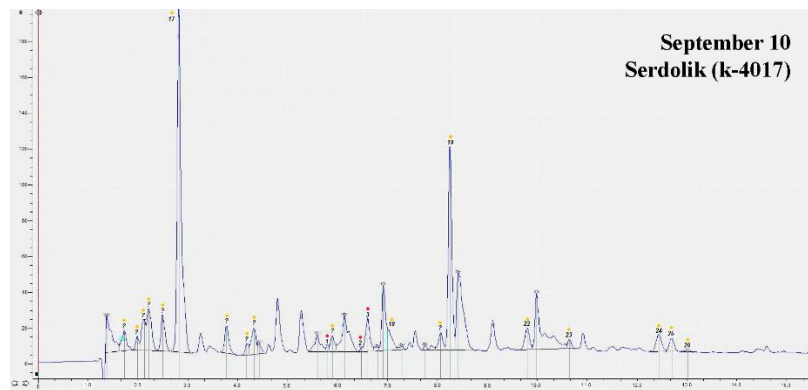

Supplement: s1 [file s1]
